# Supplementary material for: Health-Related Social Needs and Kidney Risk Factor Control in an Urban Population
Source: PubMed Central journal article supplement — Kidney Med. 2021 May 2;3(4):680–2. doi: 10.1016/j.xkme.2021.03.005 (PMC8350836; doi:10.1016/j.xkme.2021.03.005), 2021-05-02
Supplement: mmc1.pdf [file mmc1.pdf]

**Supplemental Figure S1.** Derivation of study population.

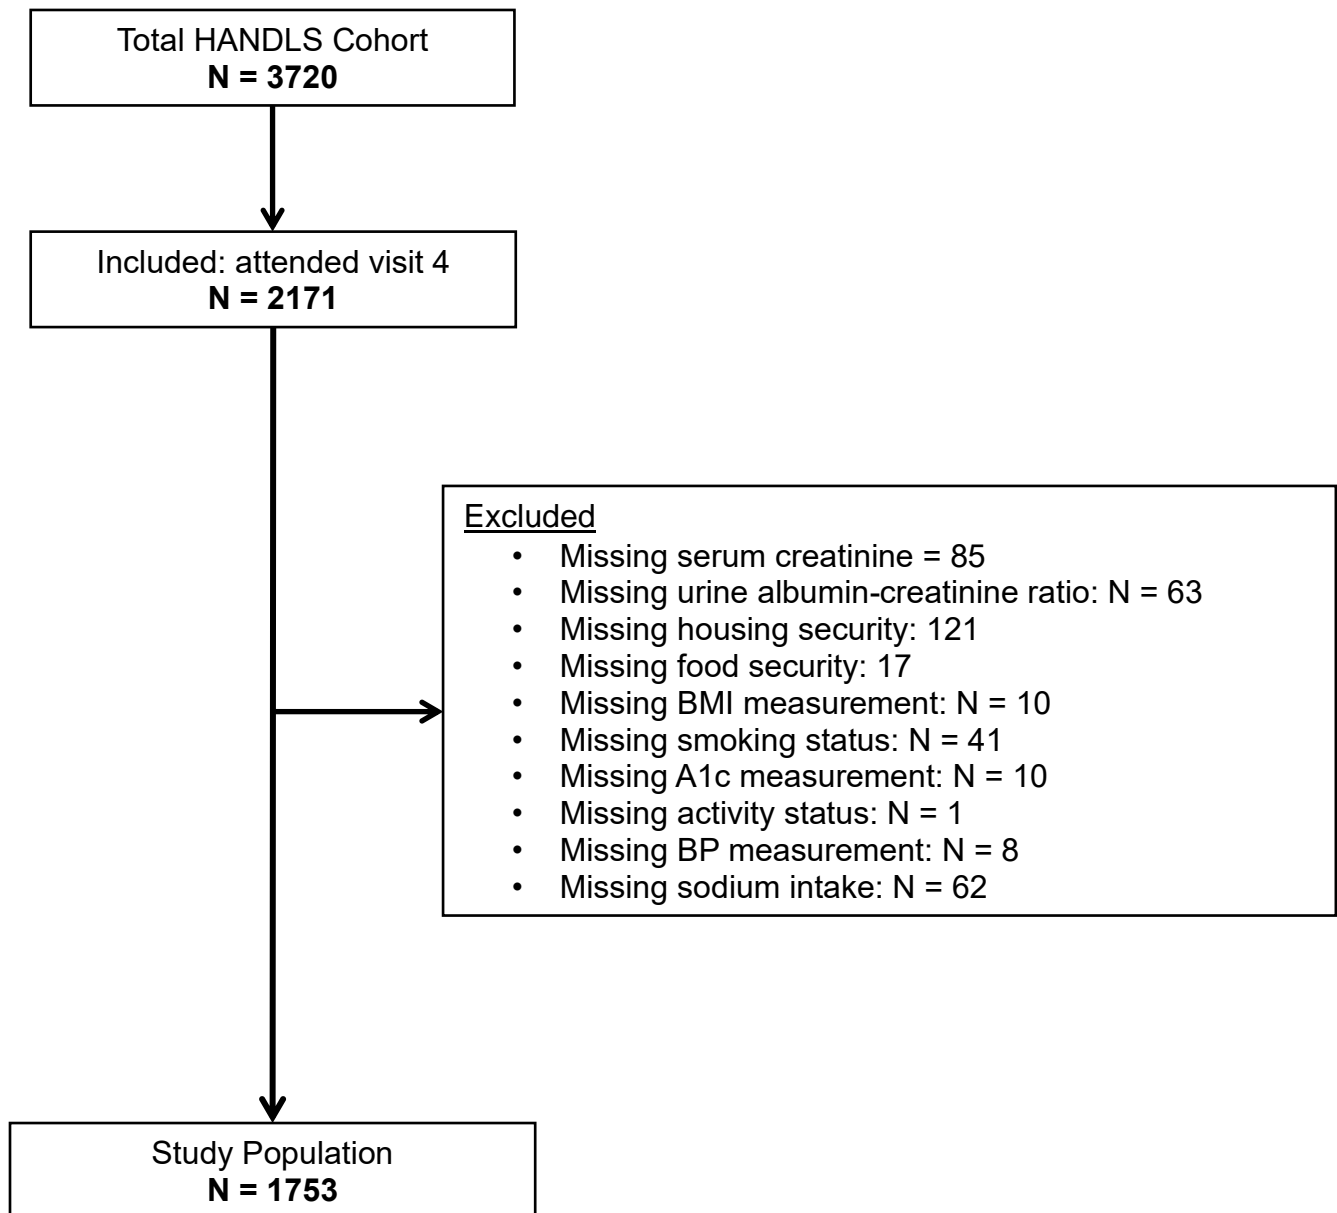

**Supplemental Figure S2.** Number of participants who achieved 1-6 protective measures.

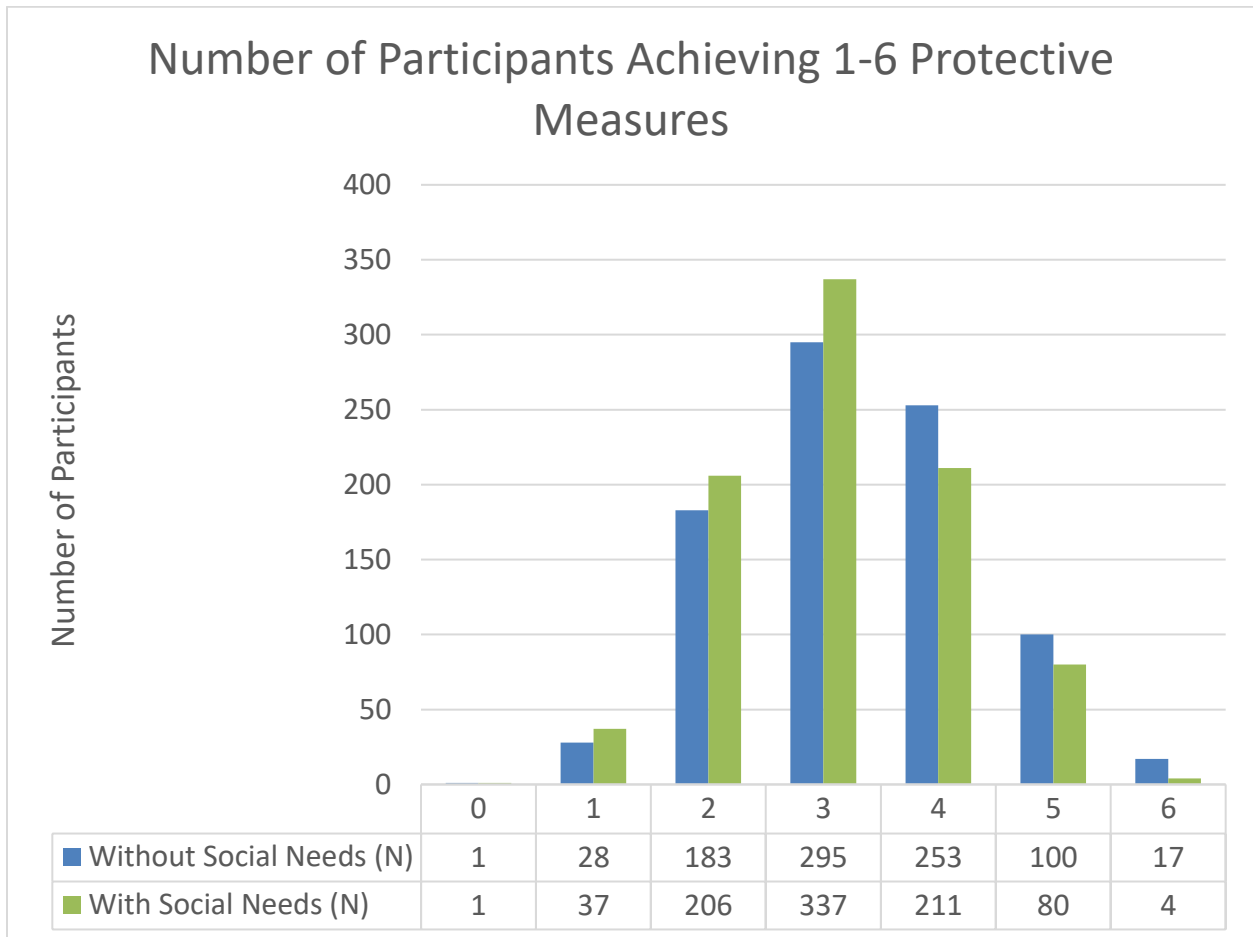

**Supplemental Figure S3.** Comparison of the number of participants who achieved the primary outcome and each independent measure.

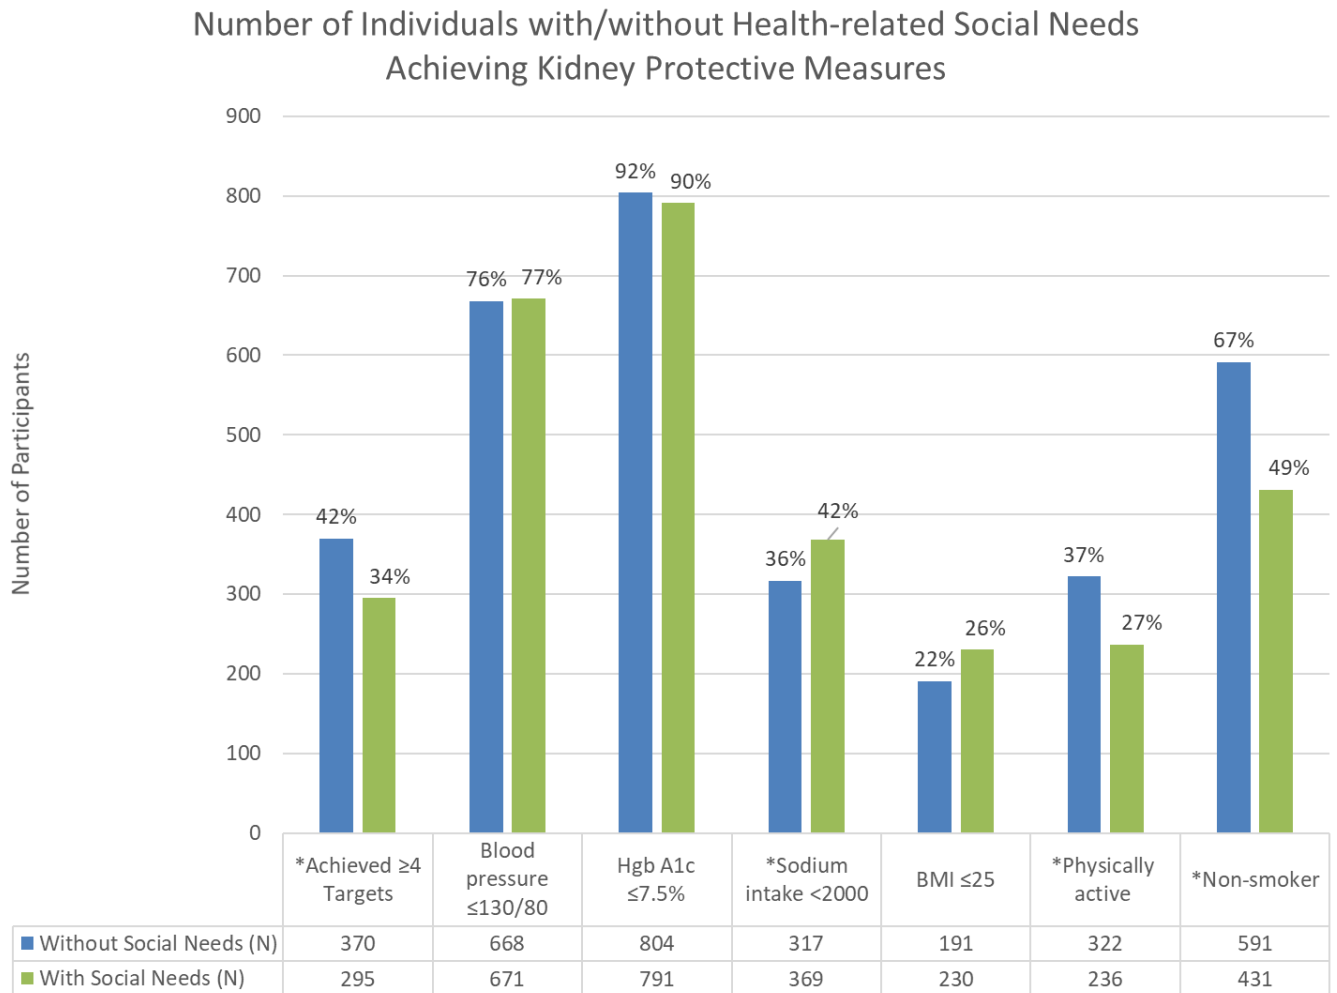

\*P-value <0.05

Abbreviations: BMI – body mass index

Units: BMI – kg/m<sup>2</sup>; Blood pressure – mmHg; Sodium intake – mg/day

Having social needs was defined as reporting housing and/or food insecurity. Food insecurity was defined as often or occasionally eating less due to not having enough money for food in the past 12 months. Housing insecurity was defined as inability to afford a suitable home, or difficulty making rent or mortgage payments.
